# Supplementary material for: Structural grounds for the 2-aminopurine mutagenicity: a novel insight into the old problem of the replication errors
Source: Royal Society of Chemistry journal article supplement (doi:10.1039/c6ra17787e), 2016-01-01
Supplement: c6ra17787e1.pdf [file c6ra17787e1.pdf]

## Electronic Supplementary Information

### **Structural grounds for the 2-aminopurine mutagenicity: A novel insight into the old problem of the replication errors**

Ol'ha O. Brovarets<sup>a,b,✉</sup>, Horacio Pérez-Sánchez<sup>c,✉</sup> & Dmytro M. Hovorun<sup>a,b</sup>

<sup>a</sup>Department of Molecular and Quantum Biophysics, Institute of Molecular Biology and Genetics, National Academy of Sciences of Ukraine, 150 Akademika Zabolotnoho Str., 03680 Kyiv, Ukraine

<sup>b</sup>Department of Molecular Biotechnology and Bioinformatics, Institute of High Technologies, Taras Shevchenko National University of Kyiv, 2-h Akademika Hlushkova Ave., 03022 Kyiv, Ukraine

<sup>c</sup>Computer Science Department, Bioinformatics and High Performance Computing (BIO-HPC) Research Group, Universidad Católica San Antonio de Murcia (UCAM), 30107 Guadalupe (Murcia), Spain

✉Corresponding authors. E-mail: o.o.brovarets@imbg.org.ua; hperez@ucam.edu

**Table S1.** Electron-topological, structural, vibrational and energetic characteristics of the intermolecular H-bonds in the investigated complexes and TSs of their tautomerisation involving DNA bases and 2AP (see Fig. 1), their energetic and polar characteristics obtained at the B3LYP/6-311++G(d,p) level of theory ( $\epsilon=1$ ).

| Base pair/complex/TS                            | AH...B<br>H-bond                    | $\rho^a$ | $\Delta\rho^b$ | $100\cdot\epsilon^c$ | $d_{A\cdots B}^d$ | $d_{H\cdots B}^e$ | $\Delta d_{AH}^f$ | $\angle AH\cdots B^g$ | $\Delta\nu^h$ | $E_{AH\cdots B}^i$ | $\Delta G^j$ | $\mu^k$ |
|-------------------------------------------------|-------------------------------------|----------|----------------|----------------------|-------------------|-------------------|-------------------|-----------------------|---------------|--------------------|--------------|---------|
| <b>2AP·H<sub>2</sub>O</b>                       | OH...N1                             | 0.031    | 0.091          | 3.70                 | 2.836             | 1.930             | 0.018             | 152.4                 | 353.6         | 5.84               | 0.00         | 3.15    |
|                                                 | N2H...O                             | 0.019    | 0.072          | 8.19                 | 2.954             | 2.070             | 0.007             | 144.5                 | 118.0         | 2.91               |              |         |
| <b>TS<sub>2AP·H2O↔2AP*·H2O</sub></b>            | N1H...O                             | 0.096    | 0.126          | 3.39                 | 2.478             | 1.429             | -                 | 150.4                 | -             | -                  | 22.05        | 4.82    |
| <b>2AP*·H<sub>2</sub>O</b>                      | N1H...O                             | 0.029    | 0.103          | 4.75                 | 2.816             | 1.893             | 0.016             | 147.9                 | 263.5         | 4.93               | 17.41        | 3.28    |
|                                                 | OH...N2                             | 0.040    | 0.102          | 4.59                 | 2.727             | 1.823             | 0.030             | 149.9                 | 561.7         | 7.54               |              |         |
| <b>A·H<sub>2</sub>O</b>                         | N6H...O                             | 0.020    | 0.076          | 5.93                 | 2.917             | 2.044             | 0.009             | 142.6                 | 149.4         | 3.45               | 0.00         | 2.94    |
|                                                 | OH...N1                             | 0.031    | 0.090          | 3.82                 | 2.829             | 1.933             | 0.019             | 150.6                 | 359.8         | 5.90               |              |         |
| <b>TS<sub>A·H2O↔A*·H2O</sub></b>                | N6 <sup>+</sup> H...O <sup>-</sup>  | 0.129    | 0.020          | 3.11                 | 2.438             | 1.315             | 0.193             | 151.1                 | 1728.2        | 13.56              | 18.40        | 4.65    |
|                                                 | N1 <sup>+</sup> H...O <sup>-</sup>  | 0.104    | 0.111          | 3.31                 | 2.461             | 1.399             | 0.137             | 149.5                 | 1549.6        | 12.82              |              |         |
| <b>A*·H<sub>2</sub>O</b>                        | OH...N6                             | 0.036    | 0.098          | 4.27                 | 2.755             | 1.863             | 0.026             | 148.6                 | 481.1         | 6.93               | 9.77         | 3.28    |
|                                                 | N1H...O                             | 0.027    | 0.097          | 4.26                 | 2.831             | 1.923             | 0.013             | 145.8                 | 220.9         | 4.44               |              |         |
| <b>2AP·T(WC)</b>                                | C6H...O4                            | 0.005    | 0.016          | 2.18                 | 3.879             | 2.792             | 0.0004            | 132.0                 | -3.1          | 0.90*              | 0.00         | 3.15    |
|                                                 | N3H...N1                            | 0.040    | 0.095          | 6.42                 | 2.876             | 1.832             | 0.032             | 179.3                 | 567.1         | 7.58               |              |         |
|                                                 | N2H...O2                            | 0.023    | 0.082          | 5.68                 | 2.998             | 1.982             | 0.010             | 174.9                 | 171.4         | 3.78               |              |         |
| <b>TS<sub>2AP+T-2AP·T(WC)↔2AP·T*(w)</sub></b>   | N1 <sup>+</sup> H...O4 <sup>-</sup> | 0.033    | 0.099          | 7.55                 | 2.918             | 1.869             | 0.036             | 143.2                 | 567.7         | 4.48               | 15.48        | 6.45    |
|                                                 | N1 <sup>+</sup> H...N3 <sup>-</sup> | 0.025    | 0.081          | 26.93                | 3.064             | 2.015             | 0.036             | 146.1                 | 567.7         | 3.10               |              |         |
|                                                 | N2 <sup>+</sup> H...N3 <sup>-</sup> | 0.022    | 0.070          | 3.88                 | 3.119             | 2.093             | 0.013             | 143.7                 | 296.8         | 3.09               |              |         |
|                                                 | N2 <sup>+</sup> H...O2 <sup>-</sup> | 0.016    | 0.053          | 34.47                | 3.201             | 2.175             | 0.019             | 151.8                 | 296.8         | 2.20               |              |         |
| <b>2AP·T*(w)</b>                                | O4H...N1                            | 0.057    | 0.097          | 5.05                 | 2.698             | 1.678             | 0.050             | 169.2                 | 954.1         | 9.98               | 7.33         | 1.52    |
|                                                 | N2H...N3                            | 0.029    | 0.085          | 7.39                 | 2.987             | 1.965             | 0.016             | 168.9                 | 295.0         | 5.27               |              |         |
| <b>TS<sub>2AP·T*(w)↔2AP*·T(w)</sub></b>         | N1H...O4                            | 0.060    | 0.141          | 3.37                 | 2.667             | 1.604             | -                 | 178.9                 | -             | 18.63*             | 14.46        | 3.39    |
| <b>2AP*·T(w)</b>                                | N1H...O4                            | 0.038    | 0.122          | 3.58                 | 2.804             | 1.770             | 0.023             | 180.0                 | 411.1         | 6.36               | 15.28        | 2.88    |
|                                                 | N3H...N2                            | 0.049    | 0.096          | 6.42                 | 2.810             | 1.748             | 0.049             | 175.0                 | 828.4         | 9.27               |              |         |
| <b>A·T(WC)</b>                                  | N6H...O4                            | 0.026    | 0.093          | 4.39                 | 2.946             | 1.926             | 0.014             | 173.5                 | 238.7         | 4.65               | 0.00         | 1.88    |
|                                                 | N3H...N1                            | 0.040    | 0.093          | 6.49                 | 2.886             | 1.841             | 0.032             | 178.8                 | 567.5         | 7.58               |              |         |
|                                                 | C2H...O2                            | 0.004    | 0.014          | 3.40                 | 3.975             | 2.890             | 0.0002            | 132.3                 | -4.8          | 0.74*              |              |         |
| <b>TS<sub>A+T-A·T(WC)↔A·T*(w)</sub></b>         | N6 <sup>+</sup> H...O4 <sup>-</sup> | 0.023    | 0.097          | 6.47                 | 2.974             | 1.953             | 0.012             | 140.6                 | 188.0         | 4.01               | 20.28        | 7.77    |
|                                                 | N1 <sup>+</sup> H...O4 <sup>-</sup> | 0.055    | 0.128          | 0.19                 | 2.723             | 1.656             | 0.053             | 153.6                 | 1668.9        | 13.32              |              |         |
|                                                 | C2 <sup>+</sup> H...N3 <sup>-</sup> | 0.009    | 0.030          | 57.50                | 3.751             | 2.665             | 0.002             | 113.5                 | -28.1         | 1.60*              |              |         |
| <b>A·T*(w)</b>                                  | N6H...N3                            | 0.017    | 0.056          | 10.90                | 3.018             | 2.240             | 0.013             | 132.0                 | 194.5         | 4.10               | 17.47        | 4.16    |
|                                                 | O4H...N6                            | 0.028    | 0.078          | 6.20                 | 2.930             | 1.963             | 0.016             | 166.1                 | 322.7         | 5.55               |              |         |
| <b>TS<sub>2AP+T-2AP·T(WC)↔2AP·T*O2(w)</sub></b> | C6H...N3                            | 0.012    | 0.058          | 24.35                | 3.125             | 2.504             | 0.001             | 115.1                 | -11.3         | 2.09*              | 22.47        | 9.59    |
|                                                 | N1H...O2                            | 0.057    | 0.058          | 0.74                 | 2.666             | 1.641             | 0.054             | 159.4                 | 840.4         | 9.34               |              |         |
|                                                 | N2H...O2                            | 0.019    | 0.058          | 6.61                 | 2.906             | 2.047             | 0.009             | 140.6                 | 136.6         | 3.24               |              |         |
| <b>2AP·T*O<sub>2</sub>(w)</b>                   | C6H...N3                            | 0.011    | 0.058          | 0.43                 | 3.309             | 2.511             | 0.000             | 129.4                 | -10.4         | 1.71*              | 17.10        | 7.05    |
|                                                 | O2H...N1                            | 0.062    | 0.058          | 5.13                 | 2.666             | 1.647             | 0.054             | 174.9                 | 1033.7        | 10.40              |              |         |
| <b>TS<sub>A+T-A·T(WC)↔A+·T*(w)</sub></b>        | N6 <sup>+</sup> H...O4 <sup>-</sup> | 0.020    | 0.065          | 16.30                | 3.102             | 2.070             | 0.024             | 153.2                 | 377.5         | 2.82               | 16.72        | 6.77    |
|                                                 | N6 <sup>+</sup> H...N3 <sup>-</sup> | 0.023    | 0.075          | 0.89                 | 3.097             | 2.064             | 0.024             | 140.7                 | 377.5         | 3.24               |              |         |
|                                                 | N1 <sup>+</sup> H...N3 <sup>-</sup> | 0.022    | 0.075          | 53.95                | 3.136             | 2.090             | 0.032             | 139.6                 | 503.7         | 2.55               |              |         |
|                                                 | N1 <sup>+</sup> H...O2 <sup>-</sup> | 0.034    | 0.101          | 4.19                 | 2.893             | 1.847             | 0.032             | 150.4                 | 503.7         | 4.56               |              |         |
| <b>A<sup>+</sup>·T*(w)</b>                      | N6 <sup>+</sup> H...N3 <sup>-</sup> | 0.069    | 0.086          | 5.82                 | 2.693             | 1.609             | 0.078             | 173.8                 | 1314.2        | 11.78              | 12.43        | 6.86    |
|                                                 | N1 <sup>+</sup> H...O2 <sup>-</sup> | 0.076    | 0.140          | 3.66                 | 2.602             | 1.508             | 0.080             | 180.0                 | 1261.5        | 11.53              |              |         |
| <b>TS<sub>A+T-(w)↔A·T*O2(w)</sub></b>           | N6H...N3                            | 0.047    | 0.099          | 6.37                 | 2.800             | 1.765             | -                 | 168.0                 | -             | 8.57*              | 10.73        | 5.63    |
| <b>A·T*O<sub>2</sub>(w)</b>                     | N6H...N3                            | 0.034    | 0.088          | 1.71                 | 2.944             | 1.915             | 0.020             | 167.1                 | 391.9         | 6.19               | 10.91        | 3.96    |
|                                                 | O2H...N1                            | 0.071    | 0.081          | 0.86                 | 2.644             | 1.608             | 0.067             | 171.9                 | 1239.6        | 11.43              |              |         |

**Table S1 (continued).**

| Base pair/TS                                                    | AH...B/<br>AH...HB<br>H-bond/<br>N...N van der<br>Waals contact | $\rho$ | $\Delta\rho$ | $100\cdot\varepsilon$ | $d_{A...B}/$<br>$d_{N...N}$ | $d_{H...B}/$<br>$d_{N...N}$ | $\Delta d_{AH}$ | $\angle AH...B$ | $\Delta\nu$ | $E_{AH...B}/$<br>$E_{AH...HB}/$<br>$E_{N...N}$ | $\Delta G$ | $\mu$ |
|-----------------------------------------------------------------|-----------------------------------------------------------------|--------|--------------|-----------------------|-----------------------------|-----------------------------|-----------------|-----------------|-------------|------------------------------------------------|------------|-------|
| <b>A*·2AP(WC)</b>                                               | C6H...N6                                                        | 0.013  | 0.039        | 5.58                  | 3.332                       | 2.388                       | 0.002           | 144.2           | 22.3        | 2.04*                                          | 0.00       | 4.57  |
|                                                                 | N1H...N1                                                        | 0.029  | 0.082        | 7.01                  | 2.991                       | 1.961                       | 0.019           | 175.2           | 346.1       | 5.77                                           |            |       |
|                                                                 | C2H...HN2                                                       | 0.001  | 0.005        | 75.42                 | 3.668                       | 2.987                       | 0.0008          | 125.7           | 14.4        | 0.17*                                          |            |       |
| <b>TS<sub>A*·2AP(WC)↔A*·2AP<sub>syn</sub></sub></b>             | C6H...O6                                                        | 0.010  | 0.029        | 2.16                  | 3.554                       | 2.501                       | 0.0025          | 162.6           | 26.8        | 1.52*                                          | 6.54       | 4.78  |
| <b>A*·2AP<sub>syn</sub></b>                                     | C6H...N6                                                        | 0.012  | 0.036        | 5.36                  | 3.413                       | 2.412                       | 0.001           | 152.4           | 9.7         | 1.89*                                          | -0.83      | 4.93  |
|                                                                 | N1H...N7                                                        | 0.027  | 0.080        | 6.02                  | 3.009                       | 1.984                       | 0.017           | 174.3           | 295.2       | 5.27                                           |            |       |
| <b>A*·A(WC)</b>                                                 | N6H...N6                                                        | 0.035  | 0.091        | 7.19                  | 2.918                       | 1.885                       | 0.028           | 176.3           | 491.5       | 7.01                                           | 0.00       | 1.75  |
|                                                                 | N1H...N1                                                        | 0.034  | 0.087        | 6.76                  | 2.943                       | 1.904                       | 0.030           | 179.0           | 474.6       | 6.88                                           |            |       |
| <b>TS<sub>A*·A(WC)↔A*·A<sub>syn</sub>(TF)</sub></b>             | N6H...N6                                                        | 0.028  | 0.082        | 3.34                  | 2.960                       | 1.985                       | 0.021           | 157.5           | 362.0       | 5.92                                           | 8.09       | 5.46  |
|                                                                 | N1H...N6                                                        | 0.011  | 0.033        | 40.58                 | 3.317                       | 2.447                       | 0.004           | 143.3           | 63.7        | 1.61                                           |            |       |
|                                                                 | N1...N6                                                         | 0.002  | 0.008        | 67.50                 | 3.790                       | -                           | -               | -               | -           | 0.39*                                          |            |       |
| <b>A*·A<sub>syn</sub>(TF)</b>                                   | N6H...N6                                                        | 0.032  | 0.098        | 7.17                  | 2.937                       | 1.921                       | 0.023           | 168.9           | 410.4       | 6.35                                           | 0.56       | 7.96  |
|                                                                 | N1H...N7                                                        | 0.032  | 0.093        | 5.99                  | 2.959                       | 1.929                       | 0.022           | 173.5           | 389.1       | 6.17                                           |            |       |
| <b>G*·2AP(w)</b>                                                | O6H...N1                                                        | 0.049  | 0.100        | 5.14                  | 2.728                       | 1.735                       | 0.038           | 168.4           | 737.7       | 8.72                                           | -1.33      | 4.58  |
|                                                                 | N2H...N1                                                        | 0.026  | 0.077        | 7.43                  | 3.029                       | 2.016                       | 0.014           | 171.3           | 271.8       | 5.02                                           |            |       |
| <b>TS<sub>G*·2AP<sup>+</sup></sub><br/>G*·2AP(WC)↔G*·2AP(w)</b> | C6 <sup>+</sup> H...O6 <sup>-</sup>                             | 0.013  | 0.049        | 67.40                 | 2.961                       | 2.380                       | 0.002           | 112.0           | 10.5        | 2.66*                                          | 16.70      | 10.62 |
|                                                                 | N1 <sup>+</sup> H...O6 <sup>-</sup>                             | 0.028  | 0.092        | 26.10                 | 2.754                       | 1.963                       | 0.037           | 129.7           | 575.9       | 3.48                                           |            |       |
|                                                                 | N1 <sup>+</sup> H...N1 <sup>-</sup>                             | 0.031  | 0.088        | 6.86                  | 2.910                       | 1.915                       | 0.037           | 156.9           | 575.9       | 4.15                                           |            |       |
|                                                                 | N2 <sup>+</sup> H...N1 <sup>-</sup>                             | 0.014  | 0.045        | 8.67                  | 3.166                       | 2.318                       | 0.011           | 139.9           | 181.3       | 2.17                                           |            |       |
|                                                                 | N2 <sup>+</sup> H...N2 <sup>-</sup>                             | 0.013  | 0.044        | 9.18                  | 3.240                       | 2.286                       | 0.011           | 155.5           | 181.3       | 1.76                                           |            |       |
| <b>G·2AP(WC)</b>                                                | C6H...O6                                                        | 0.010  | 0.029        | 2.90                  | 3.366                       | 2.470                       | 0.0009          | 138.9           | 0.1         | 1.70*                                          | 0.00       | 7.72  |
|                                                                 | N1H...N1                                                        | 0.033  | 0.088        | 6.76                  | 2.948                       | 1.916                       | 0.021           | 176.2           | 378.6       | 6.07                                           |            |       |
|                                                                 | N2H...N2                                                        | 0.008  | 0.026        | 110.77                | 3.400                       | 2.654                       | 0.003           | 130.7           | 54.1        | 1.24                                           |            |       |
| <b>TS<sub>G·2AP(WC)↔G·2AP<sub>syn</sub></sub></b>               | C6H...O6                                                        | 0.009  | 0.027        | 3.61                  | 3.484                       | 2.491                       | 0.001           | 151.2           | 9.1         | 1.56*                                          | 9.56       | 7.67  |
|                                                                 | N1H...C6                                                        | 0.004  | 0.013        | 137.20                | 3.762                       | 2.907                       | 0.000           | 142.5           | 5.5         | 0.58*                                          |            |       |
| <b>G·2AP<sub>syn</sub></b>                                      | C6H...O6                                                        | 0.012  | 0.039        | 4.75                  | 3.298                       | 2.340                       | -0.0003         | 146.0           | -13.8       | 2.12*                                          | 0.60       | 7.92  |
|                                                                 | N1H...N7                                                        | 0.027  | 0.079        | 5.85                  | 3.021                       | 1.992                       | 0.017           | 179.5           | 293.1       | 5.25                                           |            |       |
| <b>G·A(WC)</b>                                                  | N6H...O6                                                        | 0.032  | 0.109        | 3.79                  | 2.866                       | 1.842                       | 0.019           | 176.6           | 336.2       | 5.68                                           | 0.00       | 5.21  |
|                                                                 | N1H...N1                                                        | 0.032  | 0.084        | 6.64                  | 2.972                       | 1.936                       | 0.024           | 178.9           | 429.1       | 6.51                                           |            |       |
|                                                                 | C2H...HN2                                                       | 0.004  | 0.014        | 33.40                 | 3.153                       | 2.469                       | 0.0000          | 124.6           | -0.5        | 0.68*                                          |            |       |
| <b>TS<sub>G·A<sup>+</sup></sub><br/>G·A(WC)↔G·A(w)</b>          | N6 <sup>+</sup> H...O6 <sup>-</sup>                             | 0.048  | 0.162        | 5.72                  | 2.605                       | 1.648                       | 0.034           | 150.2           | 551.2       | 7.46                                           | 17.01      | 9.26  |
|                                                                 | N1 <sup>+</sup> H...O6 <sup>-</sup>                             | 0.029  | 0.091        | 10.22                 | 2.800                       | 1.946                       | 0.033           | 136.4           | 512.3       | 4.21                                           |            |       |
|                                                                 | N1 <sup>+</sup> H...N1 <sup>-</sup>                             | 0.023  | 0.072        | 18.76                 | 3.011                       | 2.045                       | 0.033           | 152.1           | 512.3       | 2.96                                           |            |       |
| <b>G*·A(w)</b>                                                  | N6H...O6                                                        | 0.012  | 0.048        | 5.41                  | 3.043                       | 2.246                       | 0.004           | 134.6           | 64.6        | 1.64                                           | 3.76       | 2.39  |
|                                                                 | O6H...N1                                                        | 0.047  | 0.103        | 4.89                  | 2.695                       | 1.755                       | 0.034           | 154.5           | 655.8       | 8.19                                           |            |       |
| <b>TS<sub>G·A(WC)↔G·A<sub>syn</sub>(TF)</sub></b>               | N6H...O6                                                        | 0.024  | 0.083        | 3.30                  | 2.942                       | 1.986                       | 0.015           | 154.7           | 249.1       | 4.77                                           | 8.39       | 6.71  |
|                                                                 | N1H...N6                                                        | 0.011  | 0.035        | 36.44                 | 3.296                       | 2.425                       | 0.003           | 143.3           | 59.6        | 1.46                                           |            |       |
|                                                                 | N1...N7                                                         | 0.002  | 0.009        | 104.95                | 3.802                       | -                           | -               | -               | -           | 0.40*                                          |            |       |
| <b>G·A<sub>syn</sub></b>                                        | N6H...O6                                                        | 0.029  | 0.104        | 2.85                  | 2.886                       | 1.874                       | 0.016           | 169.9           | 276.9       | 5.08                                           | 0.76       | 7.93  |
|                                                                 | N1H...N7                                                        | 0.032  | 0.087        | 5.50                  | 2.958                       | 1.926                       | 0.022           | 175.6           | 383.8       | 6.12                                           |            |       |
| <b>C*·2AP(WC)</b>                                               | C6H...N4                                                        | 0.007  | 0.020        | 3.62                  | 3.804                       | 2.717                       | 0.0006          | 133.6           | -0.5        | 1.10*                                          | -          | 2.70  |
|                                                                 | N3H...N1                                                        | 0.039  | 0.094        | 6.50                  | 2.883                       | 1.841                       | 0.030           | 178.9           | 543.4       | 7.40                                           |            |       |
|                                                                 | N2H...O2                                                        | 0.022  | 0.082        | 5.65                  | 3.001                       | 1.985                       | 0.010           | 174.6           | 170.3       | 3.77                                           |            |       |
| <b>C*·A(WC)</b>                                                 | N6H...N4                                                        | 0.029  | 0.082        | 7.63                  | 2.983                       | 1.959                       | 0.021           | 173.8           | 371.7       | 6.01                                           | -          | 3.10  |
|                                                                 | N3H...N1                                                        | 0.040  | 0.093        | 6.59                  | 2.895                       | 1.852                       | 0.031           | 178.9           | 551.6       | 7.46                                           |            |       |
|                                                                 | C2H...O2                                                        | 0.005  | 0.017        | 1.48                  | 3.628                       | 2.798                       | 0.0001          | 133.1           | -5.9        | 0.96*                                          |            |       |

<sup>a</sup>The electron density at the (3,-1) BCP of the H-bond, a.u.; <sup>b</sup>The Laplacian of the electron density at the (3,-1) BCP of the H-bond, a.u.; <sup>c</sup>The ellipticity at the (3,-1) BCP of the H-bond; <sup>d</sup>The distance between the A (H-bond donor) and B (H-bond acceptor) atoms of the AH...B H-bond, Å; <sup>e</sup>The distance between the H and B atoms of the AH...B H-bond, Å; <sup>f</sup>The elongation of the H-bond donating group AH upon the AH...B H-bonding, Å; <sup>g</sup>The H-bond angle, degree; <sup>h</sup>The redshift of the stretching vibrational mode  $\nu(AH)$  of the AH H-bonded group,  $\text{cm}^{-1}$ ; <sup>i</sup>Energy of the H-bonds, calculated by Iogansen's [1] or Espinose-Molins-Lecomte (EML) [2,3] (marked with an asterisk) formulas,  $\text{kcal}\cdot\text{mol}^{-1}$ ; <sup>j</sup>The relative Gibbs free energy of the complex obtained at the MP2/aug-cc-pVDZ//B3LYP/6-311++G(d,p) level of theory under normal conditions ( $\varepsilon=1$ ),  $\text{kcal}\cdot\text{mol}^{-1}$ ; <sup>k</sup>The dipole moment of the complex, D.

**Table S2.** Energetic and kinetic characteristics of the (a)  $2AP \leftrightarrow 2AP^*$ , (b)  $A \leftrightarrow A^*$ , (c)  $2AP \cdot H_2O \leftrightarrow 2AP^* \cdot H_2O$  and (d)  $A \cdot H_2O \leftrightarrow A^* \cdot H_2O$  tautomerisations obtained at the different levels of theory for the geometry calculated at the B3LYP/6-311++G(d,p) level of theory in the continuum with  $\epsilon=1/\epsilon=4$ .

| Level of theory                                                         | $\Delta G^a$ | $\Delta E^b$ | $\Delta \Delta G_{TS}^c$ | $\Delta \Delta E_{TS}^d$ | $\Delta \Delta G^e$ | $\Delta \Delta E^f$ | $\tau_{99.9\%}^g$    |
|-------------------------------------------------------------------------|--------------|--------------|--------------------------|--------------------------|---------------------|---------------------|----------------------|
| <b>(a) <math>2AP \leftrightarrow 2AP^*</math></b>                       |              |              |                          |                          |                     |                     |                      |
| $\epsilon=1$ ( $\nu_i=1798.9i$ $cm^{-1}$ )                              |              |              |                          |                          |                     |                     |                      |
| MP2/6-311++G(2df,pd)                                                    | 21.80        | 21.93        | 46.61                    | 50.09                    | 24.81               | 28.1                | $4.46 \cdot 10^5$    |
| MP2/aug-cc-pVDZ                                                         | 21.69        | 21.63        | 47.07                    | 50.55                    | 25.38               | 28.9                | $1.18 \cdot 10^6$    |
| $\epsilon=4$ ( $\nu_i=1849.2i$ $cm^{-1}$ )                              |              |              |                          |                          |                     |                     |                      |
| MP2/6-311++G(2df,pd)                                                    | 19.62        | 19.60        | 47.16                    | 50.84                    | 27.54               | 31.2                | $4.31 \cdot 10^7$    |
| MP2/aug-cc-pVDZ                                                         | 19.26        | 19.24        | 47.59                    | 51.27                    | 28.33               | 32.0                | $1.64 \cdot 10^8$    |
| <b>(b) <math>A \leftrightarrow A^*</math></b>                           |              |              |                          |                          |                     |                     |                      |
| $\epsilon=1$ ( $\nu_i=1828.5i$ $cm^{-1}$ )                              |              |              |                          |                          |                     |                     |                      |
| MP2/6-311++G(2df,pd)                                                    | 14.04        | 12.27        | 45.72                    | 47.61                    | 31.68               | 35.3                | $4.81 \cdot 10^{10}$ |
| MP2/aug-cc-pVDZ                                                         | 13.60        | 11.82        | 46.16                    | 48.05                    | 32.56               | 36.2                | $2.13 \cdot 10^{11}$ |
| $\epsilon=4$ ( $\nu_i=1869.9i$ $cm^{-1}$ )                              |              |              |                          |                          |                     |                     |                      |
| MP2/6-311++G(2df,pd)                                                    | 11.94        | 10.90        | 45.98                    | 48.80                    | 34.03               | 37.9                | $2.47 \cdot 10^{12}$ |
| MP2/aug-cc-pVDZ                                                         | 11.49        | 10.45        | 46.39                    | 49.22                    | 34.90               | 38.7                | $1.07 \cdot 10^{13}$ |
| <b>(c) <math>2AP \cdot H_2O \leftrightarrow 2AP^* \cdot H_2O</math></b> |              |              |                          |                          |                     |                     |                      |
| $\epsilon=1$ ( $\nu_i=1184.6i$ $cm^{-1}$ )                              |              |              |                          |                          |                     |                     |                      |
| MP2/6-311++G(2df,pd)                                                    | 17.48        | 16.62        | 22.20                    | 24.22                    | 4.72                | 7.59                | $1.42 \cdot 10^{-9}$ |
| MP2/aug-cc-pVDZ                                                         | 17.41        | 16.55        | 22.05                    | 24.06                    | 4.63                | 7.51                | $1.23 \cdot 10^{-9}$ |
| $\epsilon=4$ ( $\nu_i=906.2i$ $cm^{-1}$ )                               |              |              |                          |                          |                     |                     |                      |
| MP2/6-311++G(2df,pd)                                                    | 17.00        | 16.06        | 22.28                    | 23.58                    | 5.29                | 7.52                | $4.82 \cdot 10^{-9}$ |
| MP2/aug-cc-pVDZ                                                         | 16.78        | 15.84        | 21.61                    | 22.91                    | 4.83                | 7.07                | $2.24 \cdot 10^{-9}$ |
| <b>(d) <math>A \cdot H_2O \leftrightarrow A^* \cdot H_2O</math></b>     |              |              |                          |                          |                     |                     |                      |
| $\epsilon=1$ ( $\nu_i=1198.8i$ $cm^{-1}$ )                              |              |              |                          |                          |                     |                     |                      |
| MP2/6-311++G(2df,pd)                                                    | 10.00        | 9.19         | 18.59                    | 20.79                    | 8.59                | 11.60               | $9.67 \cdot 10^{-7}$ |
| MP2/aug-cc-pVDZ                                                         | 9.77         | 8.96         | 18.40                    | 20.60                    | 8.63                | 11.64               | $1.03 \cdot 10^{-6}$ |
| $\epsilon=4$ ( $\nu_i=693.4i$ $cm^{-1}$ )                               |              |              |                          |                          |                     |                     |                      |
| MP2/6-311++G(2df,pd)                                                    | 10.04        | 8.95         | 19.28                    | 20.38                    | 9.24                | 11.43               | $4.67 \cdot 10^{-6}$ |
| MP2/aug-cc-pVDZ                                                         | 9.74         | 8.65         | 18.51                    | 19.61                    | 8.77                | 10.96               | $2.11 \cdot 10^{-6}$ |

<sup>a</sup>The Gibbs free energy of the product relatively the reactant of the tautomerisation reaction (T=298.15 K), kcal·mol<sup>-1</sup>; <sup>b</sup>The electronic energy of the product relatively the reactant of the tautomerisation reaction, kcal·mol<sup>-1</sup>; <sup>c</sup>The Gibbs free energy barrier for the forward reaction of tautomerisation, kcal·mol<sup>-1</sup>; <sup>d</sup>The electronic energy barrier for the forward reaction of tautomerisation, kcal·mol<sup>-1</sup>; <sup>e</sup>The Gibbs free energy barrier for the reverse reaction of tautomerisation, kcal·mol<sup>-1</sup>; <sup>f</sup>The electronic energy barrier for the reverse reaction of tautomerisation, kcal·mol<sup>-1</sup>; <sup>g</sup>The time necessary to reach 99.9% of the equilibrium concentration between the reactant and the product of the tautomerisation reaction, s.

**Table S3.** Energetic and kinetic characteristics of the (a)  $2AP \cdot T(WC) \leftrightarrow 2AP^+ \cdot T^-(w)$ , (b)  $2AP^+ \cdot T^-(w) \leftrightarrow 2AP \cdot T^*_{O_2}(w)$ , (c)  $A \cdot T(WC) \leftrightarrow A^+ \cdot T^-(w)$ , (d)  $A^+ \cdot T^-(w) \leftrightarrow A \cdot T^*_{O_2}(w)$ , (e)  $2AP \cdot T(WC) \leftrightarrow 2AP \cdot T^*_{O_2}(w)$ , (f)  $A \cdot T(WC) \leftrightarrow A \cdot T^*_{O_2}(w)$ , (g)  $2AP \cdot T(WC) \leftrightarrow 2AP \cdot T^*(w)$ , (h)  $2AP \cdot T^*(w) \leftrightarrow 2AP^* \cdot T(w)$  and (i)  $A \cdot T(WC) \leftrightarrow A \cdot T^*(w)$  tautomerisations *via* the sequential DPT accompanied with structural rearrangements of the bases relative to each other obtained at the different levels of theory for the geometry calculated at the B3LYP/6-311++G(d,p) level of theory in the continuum with  $\epsilon=1/\epsilon=4$ .

| Level of theory                                                                   | $\Delta G^a$ | $\Delta E^b$ | $\Delta \Delta G_{TS}^c$ | $\Delta \Delta E_{TS}^d$ | $\Delta \Delta G^e$ | $\Delta \Delta E^f$ | $\tau_{99.9\%}^g$     |
|-----------------------------------------------------------------------------------|--------------|--------------|--------------------------|--------------------------|---------------------|---------------------|-----------------------|
| <b>(a) <math>2AP \cdot T(WC) \leftrightarrow 2AP^+ \cdot T^-(w)</math></b>        |              |              |                          |                          |                     |                     |                       |
| $\epsilon=4$ ( $\nu_i=75.8i$ $cm^{-1}$ )                                          |              |              |                          |                          |                     |                     |                       |
| MP2/6-311++G(2df,pd)                                                              | 15.98        | 17.68        | 18.39                    | 18.32                    | 2.41                | 0.63                | $6.43 \cdot 10^{-11}$ |
| MP2/aug-cc-pVDZ                                                                   | 15.83        | 17.54        | 17.95                    | 17.88                    | 2.11                | 0.34                | $3.93 \cdot 10^{-11}$ |
| <b>(b) <math>2AP^+ \cdot T^-(w) \leftrightarrow 2AP \cdot T^*_{O_2}(w)</math></b> |              |              |                          |                          |                     |                     |                       |
| $\epsilon=4$ ( $\nu_i=737.7i$ $cm^{-1}$ )                                         |              |              |                          |                          |                     |                     |                       |
| MP2/6-311++G(2df,pd)                                                              | -2.74        | -3.31        | -2.55                    | -0.54                    | 0.19                | 2.77                | $1.00 \cdot 10^{-14}$ |
| MP2/aug-cc-pVDZ                                                                   | -1.88        | -2.45        | -2.02                    | 0.00                     | -0.13               | 2.44                | $2.38 \cdot 10^{-14}$ |
| <b>(c) <math>A \cdot T(WC) \leftrightarrow A^+ \cdot T^-(w)</math></b>            |              |              |                          |                          |                     |                     |                       |
| $\epsilon=1$ ( $\nu_i=128.5i$ $cm^{-1}$ )                                         |              |              |                          |                          |                     |                     |                       |
| MP2/6-311++G(2df,pd)                                                              | 12.52        | 13.44        | 17.44                    | 16.74                    | 4.92                | 3.30                | $4.48 \cdot 10^{-9}$  |
| MP2/aug-cc-pVDZ                                                                   | 12.43        | 13.36        | 16.72                    | 16.02                    | 4.29                | 2.66                | $1.54 \cdot 10^{-9}$  |
| $\epsilon=4$ ( $\nu_i=113.8i$ $cm^{-1}$ )                                         |              |              |                          |                          |                     |                     |                       |
| MP2/6-311++G(2df,pd)                                                              | 10.57        | 10.91        | 15.08                    | 14.23                    | 4.51                | 3.32                | $2.24 \cdot 10^{-9}$  |
| MP2/aug-cc-pVDZ                                                                   | 10.39        | 10.73        | 14.41                    | 13.56                    | 4.03                | 2.83                | $9.86 \cdot 10^{-10}$ |
| <b>(d) <math>A^+ \cdot T^-(w) \leftrightarrow A \cdot T^*_{O_2}(w)</math></b>     |              |              |                          |                          |                     |                     |                       |
| $\epsilon=1$ ( $\nu_i=700.3i$ $cm^{-1}$ )                                         |              |              |                          |                          |                     |                     |                       |
| MP2/6-311++G(2df,pd)                                                              | -2.11        | -2.69        | -2.10                    | -0.74                    | 0.01                | 1.96                | $2.16 \cdot 10^{-14}$ |
| MP2/aug-cc-pVDZ                                                                   | -1.52        | -2.11        | -1.71                    | -0.34                    | -0.18               | 1.77                | $4.02 \cdot 10^{-14}$ |
| $\epsilon=4$ ( $\nu_i=869.2i$ $cm^{-1}$ )                                         |              |              |                          |                          |                     |                     |                       |
| MP2/6-311++G(2df,pd)                                                              | -0.87        | -0.92        | -1.34                    | 0.38                     | -0.47               | 1.30                | $5.63 \cdot 10^{-14}$ |
| MP2/aug-cc-pVDZ                                                                   | -0.19        | -0.24        | -0.73                    | 0.99                     | -0.54               | 1.23                | $1.12 \cdot 10^{-13}$ |
| <b>(e) <math>2AP \cdot T(WC) \leftrightarrow 2AP \cdot T^*_{O_2}(w)</math></b>    |              |              |                          |                          |                     |                     |                       |
| $\epsilon=1$ ( $\nu_i=76.1i$ $cm^{-1}$ )                                          |              |              |                          |                          |                     |                     |                       |
| MP2/6-311++G(2df,pd)                                                              | 16.41        | 17.22        | 22.95                    | 22.46                    | 6.54                | 5.24                | $6.94 \cdot 10^{-8}$  |
| MP2/aug-cc-pVDZ                                                                   | 17.10        | 17.91        | 22.47                    | 21.97                    | 5.36                | 4.06                | $9.52 \cdot 10^{-9}$  |
| $\epsilon=4$ ( $\nu_i=75.8i$ $cm^{-1}$ )                                          |              |              |                          |                          |                     |                     |                       |
| MP2/6-311++G(2df,pd)                                                              | 13.24        | 14.38        | 18.39                    | 18.32                    | 5.15                | 3.94                | $6.59 \cdot 10^{-9}$  |
| MP2/aug-cc-pVDZ                                                                   | 13.95        | 15.09        | 17.95                    | 17.88                    | 4.00                | 2.79                | $9.43 \cdot 10^{-10}$ |
| <b>(f) <math>A \cdot T(WC) \leftrightarrow A \cdot T^*_{O_2}(w)</math></b>        |              |              |                          |                          |                     |                     |                       |
| $\epsilon=1$ ( $\nu_i=128.5i$ $cm^{-1}$ )                                         |              |              |                          |                          |                     |                     |                       |
| MP2/6-311++G(2df,pd)                                                              | 10.41        | 10.75        | 17.44                    | 16.74                    | 7.03                | 5.99                | $1.58 \cdot 10^{-7}$  |
| MP2/aug-cc-pVDZ                                                                   | 10.91        | 11.25        | 16.72                    | 16.02                    | 5.81                | 4.77                | $2.02 \cdot 10^{-8}$  |
| $\epsilon=4$ ( $\nu_i=113.8i$ $cm^{-1}$ )                                         |              |              |                          |                          |                     |                     |                       |
| MP2/6-311++G(2df,pd)                                                              | 9.70         | 9.99         | 15.08                    | 14.23                    | 5.38                | 4.24                | $9.73 \cdot 10^{-9}$  |
| MP2/aug-cc-pVDZ                                                                   | 10.19        | 10.48        | 14.41                    | 13.56                    | 4.22                | 3.07                | $1.36 \cdot 10^{-9}$  |
| <b>(g) <math>2AP \cdot T(WC) \leftrightarrow 2AP \cdot T^*(w)</math></b>          |              |              |                          |                          |                     |                     |                       |
| $\epsilon=1$ ( $\nu_i=134.2i$ $cm^{-1}$ )                                         |              |              |                          |                          |                     |                     |                       |
| MP2/6-311++G(2df,pd)                                                              | 8.17         | 7.88         | 19.30                    | 18.17                    | 11.13               | 10.29               | $1.59 \cdot 10^{-4}$  |
| MP2/aug-cc-pVDZ                                                                   | 8.62         | 8.33         | 18.66                    | 17.53                    | 10.04               | 9.21                | $2.53 \cdot 10^{-5}$  |
| $\epsilon=4$ ( $\nu_i=112.3i$ $cm^{-1}$ )                                         |              |              |                          |                          |                     |                     |                       |
| MP2/6-311++G(2df,pd)                                                              | 6.93         | 7.39         | 16.16                    | 15.41                    | 9.23                | 8.01                | $6.48 \cdot 10^{-6}$  |
| MP2/aug-cc-pVDZ                                                                   | 7.33         | 7.79         | 15.48                    | 14.72                    | 8.15                | 6.93                | $1.04 \cdot 10^{-6}$  |
| <b>(h) <math>2AP \cdot T^*(w) \leftrightarrow 2AP^* \cdot T(w)</math></b>         |              |              |                          |                          |                     |                     |                       |
| $\epsilon=1$ ( $\nu_i=1018.0i$ $cm^{-1}$ )                                        |              |              |                          |                          |                     |                     |                       |
| MP2/6-311++G(2df,pd)                                                              | 8.17         | 7.84         | 7.36                     | 9.48                     | -0.81               | 1.64                | $1.46 \cdot 10^{-13}$ |
| MP2/aug-cc-pVDZ                                                                   | 7.83         | 7.50         | 7.02                     | 9.14                     | -0.81               | 1.64                | $1.46 \cdot 10^{-13}$ |
| $\epsilon=4$ ( $\nu_i=1129.2i$ $cm^{-1}$ )                                        |              |              |                          |                          |                     |                     |                       |
| MP2/6-311++G(2df,pd)                                                              | 8.35         | 7.43         | 7.53                     | 9.07                     | -0.82               | 1.64                | $1.29 \cdot 10^{-13}$ |
| MP2/aug-cc-pVDZ                                                                   | 7.90         | 6.98         | 7.10                     | 8.64                     | -0.80               | 1.66                | $1.33 \cdot 10^{-13}$ |
| <b>(i) <math>A \cdot T(WC) \leftrightarrow A \cdot T^*(w)</math></b>              |              |              |                          |                          |                     |                     |                       |
| $\epsilon=1$ ( $\nu_i=99.7i$ $cm^{-1}$ )                                          |              |              |                          |                          |                     |                     |                       |
| MP2/6-311++G(2df,pd)                                                              | 12.47        | 14.23        | 20.82                    | 20.95                    | 8.35                | 6.73                | $1.47 \cdot 10^{-6}$  |
| MP2/aug-cc-pVDZ                                                                   | 13.08        | 14.84        | 20.28                    | 20.41                    | 7.20                | 5.57                | $2.09 \cdot 10^{-7}$  |
| $\epsilon=4$ ( $\nu_i=79.4i$ $cm^{-1}$ )                                          |              |              |                          |                          |                     |                     |                       |
| MP2/6-311++G(2df,pd)                                                              | 10.01        | 11.79        | 16.48                    | 16.86                    | 6.47                | 5.07                | $6.13 \cdot 10^{-8}$  |
| MP2/aug-cc-pVDZ                                                                   | 10.69        | 12.47        | 16.03                    | 16.42                    | 5.34                | 3.94                | $9.20 \cdot 10^{-9}$  |

See definitions in Table S2.

**Table S4.** Energetic and kinetic characteristics of the (a)  $A^* \cdot 2AP(WC) \leftrightarrow A^* \cdot 2AP_{syn}$ , (b)  $A^* \cdot A(WC) \leftrightarrow A^* \cdot A_{syn}(TF)$ , (c)  $G^* \cdot 2AP(w) \leftrightarrow G \cdot 2AP(WC)$ , (d)  $G \cdot 2AP(WC) \leftrightarrow G \cdot 2AP_{syn}$ , (e)  $G^* \cdot A(w) \leftrightarrow G \cdot A(WC)$  and (f)  $G \cdot A(WC) \leftrightarrow G \cdot A_{syn}$  tautomerisations *via* the sequential DPT and conformational transitions obtained at the different levels of theory for the geometry calculated at the B3LYP/6-311++G(d,p) level of theory in the continuum with  $\epsilon=1/\epsilon=4$ .

| Level of theory                                                               | $\Delta G$ | $\Delta E$ | $\Delta\Delta G_{TS}$ | $\Delta\Delta E_{TS}$ | $\Delta\Delta G$ | $\Delta\Delta E$ | $\tau_{99,9\%}$       |
|-------------------------------------------------------------------------------|------------|------------|-----------------------|-----------------------|------------------|------------------|-----------------------|
| <b>(a) <math>A^* \cdot 2AP(WC) \leftrightarrow A^* \cdot 2AP_{syn}</math></b> |            |            |                       |                       |                  |                  |                       |
| $\epsilon=1$ ( $\nu_i=18.0i$ $cm^{-1}$ )                                      |            |            |                       |                       |                  |                  |                       |
| MP2/6-311++G(2df,pd)                                                          | -0.94      | -0.70      | 5.59                  | 7.60                  | 6.53             | 8.30             | $1.17 \cdot 10^{-8}$  |
| MP2/aug-cc-pVDZ                                                               | -0.83      | -0.59      | 6.54                  | 8.55                  | 7.37             | 9.14             | $5.59 \cdot 10^{-8}$  |
| $\epsilon=4$ ( $\nu_i=6.4i$ $cm^{-1}$ )                                       |            |            |                       |                       |                  |                  |                       |
| MP2/6-311++G(2df,pd)                                                          | -0.62      | -0.19      | 4.02                  | 6.34                  | 4.64             | 6.53             | $7.34 \cdot 10^{-10}$ |
| MP2/aug-cc-pVDZ                                                               | -0.49      | -0.07      | 5.13                  | 7.45                  | 5.62             | 7.52             | $4.49 \cdot 10^{-9}$  |
| <b>(b) <math>A^* \cdot A(WC) \leftrightarrow A^* \cdot A_{syn}(TF)</math></b> |            |            |                       |                       |                  |                  |                       |
| $\epsilon=1$ ( $\nu_i=15.8i$ $cm^{-1}$ )                                      |            |            |                       |                       |                  |                  |                       |
| MP2/6-311++G(2df,pd)                                                          | 0.54       | 1.22       | 7.50                  | 7.50                  | 6.96             | 6.29             | $1.01 \cdot 10^{-7}$  |
| MP2/aug-cc-pVDZ                                                               | 0.56       | 1.23       | 8.09                  | 8.09                  | 7.53             | 6.85             | $2.66 \cdot 10^{-7}$  |
| $\epsilon=4$ ( $\nu_i=8.1i$ $cm^{-1}$ )                                       |            |            |                       |                       |                  |                  |                       |
| MP2/6-311++G(2df,pd)                                                          | 0.40       | 0.35       | 4.78                  | 6.90                  | 4.38             | 6.55             | $1.20 \cdot 10^{-9}$  |
| MP2/aug-cc-pVDZ                                                               | 0.44       | 0.38       | 5.68                  | 7.80                  | 5.25             | 7.42             | $5.32 \cdot 10^{-9}$  |
| <b>(c) <math>G^* \cdot 2AP(w) \leftrightarrow G \cdot 2AP(WC)</math></b>      |            |            |                       |                       |                  |                  |                       |
| $\epsilon=1$ ( $\nu_i=130.1i$ $cm^{-1}$ )                                     |            |            |                       |                       |                  |                  |                       |
| MP2/6-311++G(2df,pd)                                                          | 2.06       | 1.80       | 19.64                 | 18.19                 | 17.58            | 16.38            | 8.29                  |
| MP2/aug-cc-pVDZ                                                               | 1.33       | 1.07       | 18.04                 | 16.58                 | 16.70            | 15.51            | 1.77                  |
| $\epsilon=4$ ( $\nu_i=104.6i$ $cm^{-1}$ )                                     |            |            |                       |                       |                  |                  |                       |
| MP2/6-311++G(2df,pd)                                                          | -0.47      | -0.36      | 13.74                 | 13.05                 | 14.21            | 13.41            | $9.07 \cdot 10^{-3}$  |
| MP2/aug-cc-pVDZ                                                               | -1.20      | -1.09      | 12.30                 | 11.61                 | 13.50            | 12.71            | $1.03 \cdot 10^{-3}$  |
| <b>(d) <math>G \cdot 2AP(WC) \leftrightarrow G \cdot 2AP_{syn}</math></b>     |            |            |                       |                       |                  |                  |                       |
| $\epsilon=1$ ( $\nu_i=17.7i$ $cm^{-1}$ )                                      |            |            |                       |                       |                  |                  |                       |
| MP2/6-311++G(2df,pd)                                                          | 0.27       | 1.18       | 7.23                  | 9.31                  | 6.96             | 8.13             | $8.70 \cdot 10^{-8}$  |
| MP2/aug-cc-pVDZ                                                               | 0.60       | 1.51       | 8.23                  | 10.31                 | 7.63             | 8.80             | $3.22 \cdot 10^{-7}$  |
| $\epsilon=4$ ( $\nu_i=6.4i$ $cm^{-1}$ )                                       |            |            |                       |                       |                  |                  |                       |
| MP2/6-311++G(2df,pd)                                                          | 1.48       | 1.17       | 5.93                  | 8.16                  | 4.45             | 6.99             | $1.89 \cdot 10^{-9}$  |
| MP2/aug-cc-pVDZ                                                               | 1.64       | 1.33       | 7.26                  | 9.49                  | 5.62             | 8.16             | $1.39 \cdot 10^{-8}$  |
| <b>(e) <math>G^* \cdot A(w) \leftrightarrow G \cdot A(WC)</math></b>          |            |            |                       |                       |                  |                  |                       |
| $\epsilon=1$ ( $\nu_i=107.2i$ $cm^{-1}$ )                                     |            |            |                       |                       |                  |                  |                       |
| MP2/6-311++G(2df,pd)                                                          | -3.27      | -5.70      | 13.60                 | 11.24                 | 16.88            | 16.94            | $9.71 \cdot 10^{-3}$  |
| MP2/aug-cc-pVDZ                                                               | -4.30      | -6.73      | 12.33                 | 9.97                  | 16.64            | 16.70            | $1.22 \cdot 10^{-3}$  |
| $\epsilon=4$ ( $\nu_i=84.5i$ $cm^{-1}$ )                                      |            |            |                       |                       |                  |                  |                       |
| MP2/6-311++G(2df,pd)                                                          | -4.00      | -6.03      | 9.51                  | 7.17                  | 13.51            | 13.20            | $1.04 \cdot 10^{-5}$  |
| MP2/aug-cc-pVDZ                                                               | -4.87      | -6.90      | 8.42                  | 6.08                  | 13.29            | 12.98            | $1.65 \cdot 10^{-6}$  |
| <b>(f) <math>G \cdot A(WC) \leftrightarrow G \cdot A_{syn}</math></b>         |            |            |                       |                       |                  |                  |                       |
| $\epsilon=1$ ( $\nu_i=20.7i$ $cm^{-1}$ )                                      |            |            |                       |                       |                  |                  |                       |
| MP2/6-311++G(2df,pd)                                                          | 0.73       | 0.55       | 7.80                  | 8.29                  | 7.07             | 7.75             | $1.32 \cdot 10^{-7}$  |
| MP2/aug-cc-pVDZ                                                               | 0.76       | 0.58       | 8.39                  | 8.89                  | 7.64             | 8.31             | $3.47 \cdot 10^{-7}$  |
| $\epsilon=4$ ( $\nu_i=14.4i$ $cm^{-1}$ )                                      |            |            |                       |                       |                  |                  |                       |
| MP2/6-311++G(2df,pd)                                                          | 0.26       | -0.06      | 6.55                  | 7.13                  | 6.30             | 7.20             | $2.81 \cdot 10^{-8}$  |
| MP2/aug-cc-pVDZ                                                               | 0.30       | -0.02      | 7.41                  | 7.99                  | 7.11             | 8.01             | $1.14 \cdot 10^{-7}$  |

See definitions in Table S2.

## References

1. Espinosa, E., Molins, E., & Lecomte, C. Hydrogen bond strengths revealed by topological analyses of experimentally observed electron densities. *Chem. Phys. Lett.*, 1998, **285**, 170–173.
2. Mata, I., Alkorta, I., Espinosa, E., & Molins, E. Relationships between interaction energy, intermolecular distance and electron density properties in hydrogen bonded complexes under external electric fields. *Chem. Phys. Lett.*, 2011, **507**, 185–189.
3. Iogansen, A.V. Direct proportionality of the hydrogen bonding energy and the intensification of the stretching  $\nu(\text{XH})$  vibration in infrared spectra. *Spectrochim. Acta Part A: Mol. Biomol. Spectrosc.*, 1999, **55**, 1585–1612.
